# Supplementary material for: Submerged and Solid-State Fermentation of Spirulina with Lactic Acid Bacteria Strains: Antimicrobial Properties and the Formation of Bioactive Compounds of Protein Origin
Source: MDPI journal article supplement (doi:10.3390/biology12020248), 2023-02-03
Supplement: s1 [file s1]

**Table S1.** Biogenic amine (BA) concentrations in control *Spirulina* samples.

| Spirulina samples | Fermentation     |                 | Biogenic amines concentration, mg/kg |     |           |             |     |           |            |          |
|-------------------|------------------|-----------------|--------------------------------------|-----|-----------|-------------|-----|-----------|------------|----------|
|                   |                  |                 | TRP                                  | PHE | PUT       | CAD         | HIS | TYR       | SPRMD      | SPRM     |
|                   | Dura-<br>tion, h | Condi-<br>tions |                                      |     |           |             |     |           |            |          |
| Control (I)       | -                |                 | 2.32±0.99                            | nd  | 5.43±1.05 | 0.873±0.098 | nd  | 6.32±1.13 | 202.3±11.2 | 11.6±3.2 |
| Control (II)      | -                |                 | 2.66/1.02                            | nd  | 6.79±1.11 | 0.939±0.102 | nd  | 7.78±1.23 | 279.1±12.8 | 13.8±4.1 |

Control (I) - *Spirulina* powder and water mixture, 1:20 w/w; Control (II) - *Spirulina* powder and water mixture, 1:2 w/w; SSF – solid state fermentation; SMF – submerged fermentation; TRP – tryptamine; PHE - phenylethylamine; PUT - putrescine; CAD - cadaverine; HIS - histamine; TYR - tyramine; SPRMD - spermidine; SPRM – spermine; nd - not determined.

Data are represented as means (n = 6) ± standard error. <sup>a-b</sup> mean values denoted with different letters, indicates significantly different values between the lines (p ≤ 0.05).

**Table S2.** Biogenic amine (BA) concentrations in *Spirulina* samples.

| Spirulina samples                         | Fermentation     |                 | Biogenic amines concentration, mg/kg |     |             |            |            |             |             |           |
|-------------------------------------------|------------------|-----------------|--------------------------------------|-----|-------------|------------|------------|-------------|-------------|-----------|
|                                           |                  |                 | TRP                                  | PHE | PUT         | CAD        | HIS        | TYR         | SPRMD       | SPRM      |
|                                           | Dura-<br>tion, h | Condi-<br>tions |                                      |     |             |            |            |             |             |           |
| <i>Lactaseibacillus paracasei</i> No. 244 | 24h              | SMF             | 4.77±0.8a                            | nd  | 5.84±0.97   | nd         | nd         | 45.2±2.1c   | 51.1±3.9a   | nd        |
|                                           | 48h              |                 | nd                                   | nd  | 274.9±19.8d | nd         | nd         | 108.9±16.7f | 61.6±4.7a   | nd        |
|                                           | 24h              | SSF             | 4.56±0.65a                           | nd  | 730.4±14.9e | 2.24±0.43a | 32.1±1.9b  | 167.7±15.3g | 487.4±14.9b | 18.6±0.9c |
|                                           | 48h              |                 | 6.12±0.99b                           | nd  | 814.8±16.8f | 24.4±1.3b  | 137.9±5.2c | 609.4±15.9h | 458.6±15.1b | 18.3±1.0c |
| <i>Levilactobacillus brevis</i> No. 173   | 24h              | SMF             | nd                                   | nd  | 92.3±7.1b   | nd         | nd         | nd          | 53.9±4.3a   | nd        |
|                                           | 48h              |                 | nd                                   | nd  | 95.7±4.2b   | nd         | 1.32±0.41a | 28.3±2.1b   | 54.4±4.0a   | nd        |
|                                           | 24h              | SSF             | 5.84±0.86b                           | nd  | 833.4±17.0f | nd         | nd         | 26.6±2.4b   | 516.2±15.7b | 19.2±2.4c |
|                                           | 48h              |                 | 5.55±0.79b                           | nd  | 854.7±16.2f | nd         | nd         | 31.1±2.8b   | 518.7±15.6b | 21.5±2.1c |
| <i>Leuconostoc mesenteroides</i> No. 225  | 24h              | SMF             | nd                                   | nd  | 96.1±4.7b   | nd         | nd         | 5.50±0.96a  | 49.7±3.5a   | nd        |
|                                           | 48h              |                 | nd                                   | nd  | 99.9±4.9b   | nd         | nd         | 34.7±2.3b   | 52.4±4.6a   | nd        |
|                                           | 24h              | SSF             | 5.06±0.88ba                          | nd  | 778.9±14.6f | 1.93±0.97a | 1.78±0.82a | 85.4±3.83   | 460.2±15.3b | 18.9±2.1c |

|                             |     |     |              |    |             |    |    |            |             |            |
|-----------------------------|-----|-----|--------------|----|-------------|----|----|------------|-------------|------------|
|                             | 48h |     | 5.32±0.86a,b | nd | 784.5±18.1f | nd | nd | 61.2±3.0d  | 468.9±13.9b | 8.21±0.96b |
|                             | 24h | SMF | nd           | nd | 58.1±3.8a   | nd | nd | 0.99±0.09a | 49.9±3.4a   | nd         |
|                             | 48h |     | nd           | nd | 99.8±6.4b   | nd | nd | 17.7±1.4b  | 61.2±4.7a   | 1.52±0.08a |
| <i>Liquorilactobacillus</i> | 24h |     | 6.35±0.75b   | nd | 229.5±14.3c | nd | nd | 22.0±1.2b  | 440.0±14.2b | 17.2±1.8c  |
| <i>uvarum</i> No. 245       | 48h | SSF | 7.53±1.12c   | nd | 670.1±15.2e | nd | nd | 25.2±2.1b  | 457.9±14.4b | 18.1±1.7c  |

TRP – tryptamine; PHE - phenylethylamine; PUT - putrescine; CAD - cadaverine; HIS - histamine; TYR - tyramine; SPRMD - spermidine; SPRM – spermine; nd - not determined.

Data are represented as means (n = 6) ± standard error. <sup>a-b</sup> mean values denoted with different letters, indicates significantly different values between the lines (p ≤ 0.05).
