# Supplementary material for: Submerged and Solid-State Fermentation of Spirulina with Lactic Acid Bacteria Strains: Antimicrobial Properties and the Formation of Bioactive Compounds of Protein Origin
Source: MDPI journal article supplement (doi:10.3390/biology12020248), 2023-02-03
Supplement: s1 [file s1]

**Table S1.** Influence of the analysed factors [lactic acid bacteria (LAB) used for fermentation; duration of fermentation; fermentation conditions] and their interaction on lactic acid bacteria viable counts and pH of the *Spirulina* samples.

| Spirulina parameters | LAB   | Duration of fermentation | SMF-SSF | LAB × Duration of fermentation | LAB × SMF-SSF | Duration of fermentation × SMF-SSF | LAB × Duration of fermentation × SMF-SSF |
|----------------------|-------|--------------------------|---------|--------------------------------|---------------|------------------------------------|------------------------------------------|
| p values             |       |                          |         |                                |               |                                    |                                          |
| pH                   | 0.724 | 0.524                    | 0.066   | 0.527                          | 0.246         | 0.124                              | 0.795                                    |
| LAB viable counts    | 0.154 | 0.481                    | 0.067   | 0.439                          | 0.533         | 0.284                              | 0.693                                    |

LAB – lactic acid bacteria strain used for fermentation; SMF – submerged fermentation; SSF – solid-state fermentation; Factor or factors interaction is significant, when  $p \leq 0.05$

**Table S2.** Influence of the analysed factors [lactic acid bacteria (LAB) used for fermentation; duration of fermentation; fermentation conditions] and their interaction on the concentrations of L-glutamic (L-Glu) and gamma-aminobutyric (GABA) acids in *Spirulina* samples.

| Spirulina parameters | LAB          | Duration of fermentation | SMF-SSF       | LAB × Duration of fermentation | LAB × SMF-SSF | Duration of fermentation × SMF-SSF | LAB × Duration of fermentation × SMF-SSF |
|----------------------|--------------|--------------------------|---------------|--------------------------------|---------------|------------------------------------|------------------------------------------|
| p values             |              |                          |               |                                |               |                                    |                                          |
| GABA                 | <b>0.001</b> | 0.868                    | <b>0.019</b>  | 0.561                          | <b>0.011</b>  | 0.497                              | 0.503                                    |
| L-Glu                | 0.368        | 0.910                    | <b>0.0001</b> | 0.889                          | 0.433         | 0.937                              | 0.771                                    |

GABA – gamma-aminobutyric acid; L-Glu – L-glutamic acid; LAB – lactic acid bacteria strain used for fermentation; SMF – submerged fermentation; SSF – solid-state fermentation; Factor or factors interaction is significant, when  $p \leq 0.05$ .

**Table S3.** Influence of the analysed factors [lactic acid bacteria (LAB) used for fermentation; duration of fermentation; fermentation conditions] and their interaction on biogenic amine (BA) content in *Spirulina*.

| Spirulina parameters | LAB           | Duration of fermentation | SMF-SSF       | LAB × Duration of fermentation | LAB × SMF-SSF | Duration of fermentation × SMF-SSF | LAB × Duration of fermentation × SMF-SSF |
|----------------------|---------------|--------------------------|---------------|--------------------------------|---------------|------------------------------------|------------------------------------------|
| p values             |               |                          |               |                                |               |                                    |                                          |
| TRP                  | <b>0.001</b>  | <b>0.021</b>             | <b>0.0001</b> | <b>0.001</b>                   | <b>0.0001</b> | <b>0.0001</b>                      | <b>0.0001</b>                            |
| PUT                  | <b>0.0001</b> | <b>0.0001</b>            | <b>0.0001</b> | <b>0.0001</b>                  | <b>0.0001</b> | <b>0.0001</b>                      | <b>0.0001</b>                            |
| CAD                  | <b>0.0001</b> | <b>0.0001</b>            | <b>0.0001</b> | <b>0.0001</b>                  | <b>0.0001</b> | <b>0.0001</b>                      | <b>0.0001</b>                            |
| HIS                  | <b>0.0001</b> | <b>0.0001</b>            | <b>0.0001</b> | <b>0.0001</b>                  | <b>0.0001</b> | <b>0.0001</b>                      | <b>0.0001</b>                            |
| TYR                  | <b>0.0001</b> | <b>0.0001</b>            | <b>0.0001</b> | <b>0.0001</b>                  | <b>0.0001</b> | <b>0.0001</b>                      | <b>0.0001</b>                            |
| SPRMD                | <b>0.0001</b> | 0.370                    | <b>0.0001</b> | 0.082                          | <b>0.0001</b> | 0.229                              | <b>0.020</b>                             |
| SPRM                 | <b>0.0001</b> | 0.263                    | <b>0.0001</b> | <b>0.0001</b>                  | <b>0.0001</b> | 0.001                              | <b>0.001</b>                             |

LAB – lactic acid bacteria strain used for fermentation; SMF – submerged fermentation; SSF – solid-state fermentation; TRP – tryptamine; PHE – phenylethylamine; PUT – putrescine; CAD – cadaverine; HIS – histamine; TYR – tyramine; SPRMD – spermidine; SPRM – spermine; Factor or factors interaction is significant, when  $p \leq 0.05$ .

**Table S4.** Influence of the analysed factors [lactic acid bacteria used for fermentation; duration of fermentation; fermentation conditions] and their interaction on diameter of inhibition zones (DIZ) by *Spirulina* against *Staphylococcus aureus*.

| Spirulina parameters | LAB           | Duration of fermentation | SMF-SSF | LAB × Duration of fermentation | LAB × SMF-SSF | Duration of fermentation × SMF-SSF | LAB × Duration of fermentation × SMF-SSF |
|----------------------|---------------|--------------------------|---------|--------------------------------|---------------|------------------------------------|------------------------------------------|
| p values             |               |                          |         |                                |               |                                    |                                          |
| DIZ                  | <b>0.0001</b> | 0.209                    | 0.514   | <b>0.0001</b>                  | 0.822         | <b>0.0001</b>                      | <b>0.0001</b>                            |

DIZ – diameter of inhibition zones; LAB – lactic acid bacteria strain used for fermentation; SMF – submerged fermentation; SSF – solid-state fermentation; Factor or factors interaction is significant, when  $p \leq 0.05$ .
